# Supplementary material
Source: Springer Nature journal article supplement (https://www.springermedizin.de/resource/supplementary/12936_2010_1593_MOESM3_ESM.pdf/9541502)

A.

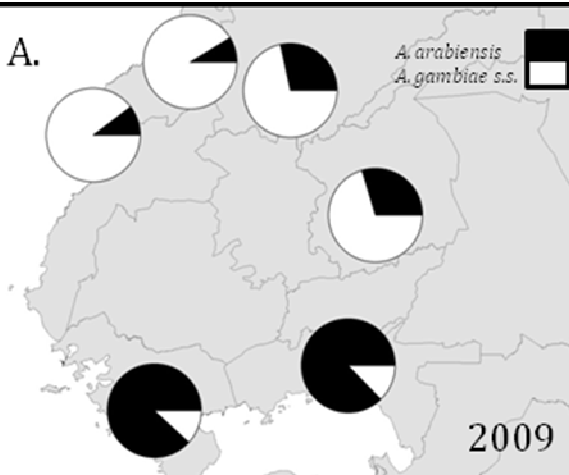

B.

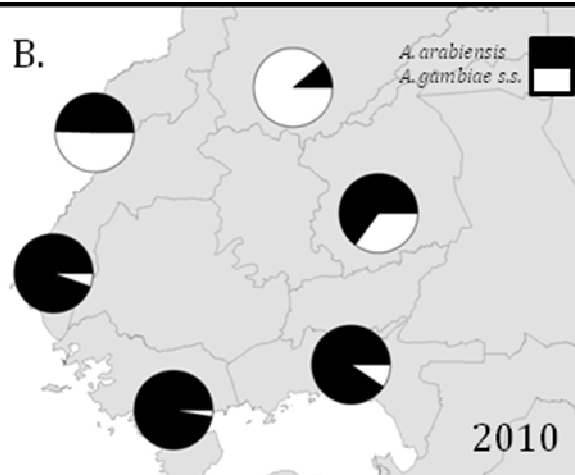

C.

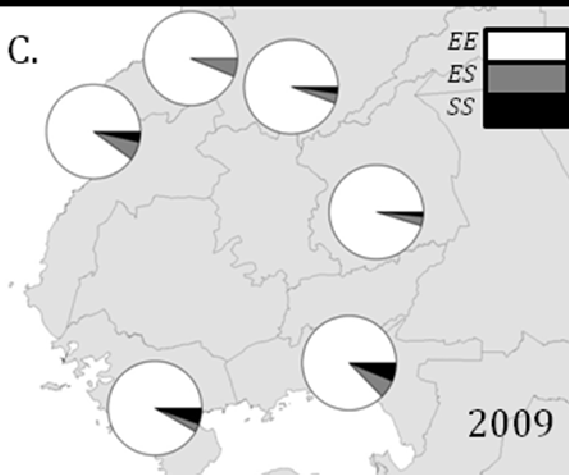

D.

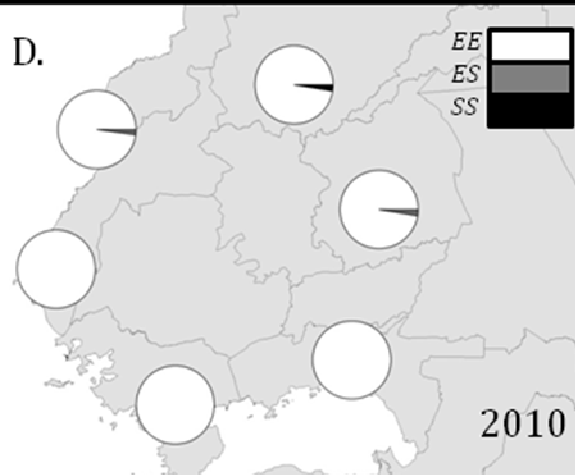

Supplement: MOESM3 [file 9541502]
